# Supplementary material for: Relationship between Pan-immuno-inflammatory value and hospitalized all-cause mortality in ischemic stroke patients: a retrospective cohort study and predictive modeling
Source: Research Square preprint supplement (doi:10.21203/rs.3.rs-6615694/v1), 2025-09-09
Supplement: Supplementary file 1 [file 4c680e5147816276a041af44.docx]

Table S1 Comparing the Performance of 14 Machine Learning Models for Predicting the Risk of In-Hospital Death among Patients with IS

| Model | AUC | L 95CI | H 95CI |
| --- | --- | --- | --- |
| GBDT | 0.832 | 0.789 | 0.873 |
| CatBoost | 0.828 | 0.781 | 0.871 |
| RF | 0.828 | 0.778 | 0.871 |
| LightGBM | 0.827 | 0.778 | 0.870 |
| LDA | 0.826 | 0.775 | 0.871 |
| XGBoost | 0.824 | 0.778 | 0.867 |
| ET | 0.819 | 0.770 | 0.866 |
| NB | 0.818 | 0.771 | 0.860 |
| AB | 0.812 | 0.763 | 0.856 |
| LR | 0.789 | 0.736 | 0.840 |
| KNN | 0.744 | 0.680 | 0.801 |
| SVM | 0.717 | 0.645 | 0.783 |

GBDT: Gradient Boosting Decision Tree; RF: Random Forest; ET: [ExtraTrees](https://www.bing.com/ck/a?!&&p=a2556856884eabc3a0ea9af3d83bff706ad8cd6fc0811243cc51b695b49ad595JmltdHM9MTczNDQ4MDAwMA&ptn=3&ver=2&hsh=4&fclid=33b856a0-1bbf-67e0-0214-43bb1a6d6603&psq=ET%e9%a2%84%e6%b5%8b%e6%a8%a1%e5%9e%8b%e6%98%af%e4%bb%80%e4%b9%88&u=a1aHR0cHM6Ly9ibG9nLmNzZG4ubmV0L3hibWF0cml4L2FydGljbGUvZGV0YWlscy82OTQ4ODg2Nw&ntb=1" \t "https://cn.bing.com/_blank); NB: Naive Bayes; AB: AdaBoost; LR: Logistic regression; KNN: K-nearest neighbor; SVM: Support vector machines

Figure S1 Detailed performance metrics were obtained for 14 machine learning models.


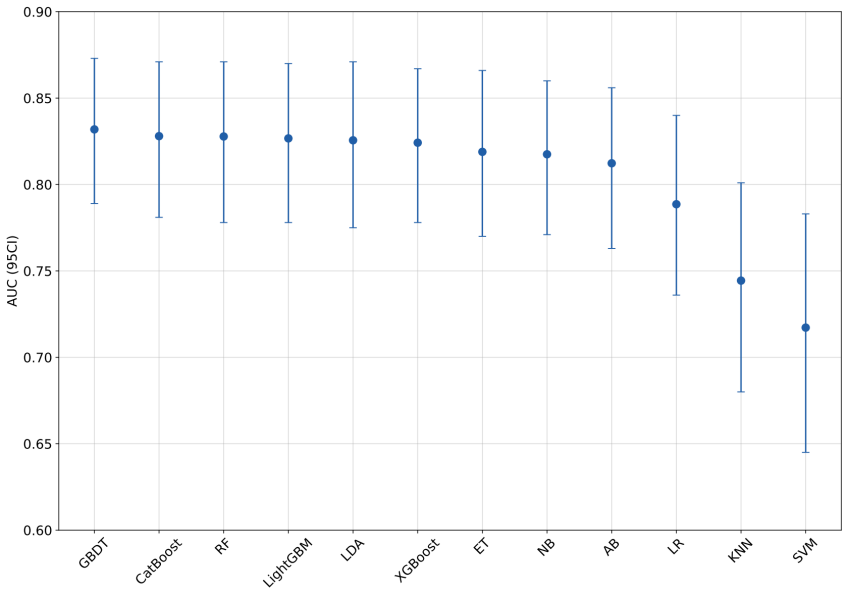


GBDT: Gradient Boosting Decision Tree; RF: Random Forest; ET: [ExtraTrees](https://www.bing.com/ck/a?!&&p=a2556856884eabc3a0ea9af3d83bff706ad8cd6fc0811243cc51b695b49ad595JmltdHM9MTczNDQ4MDAwMA&ptn=3&ver=2&hsh=4&fclid=33b856a0-1bbf-67e0-0214-43bb1a6d6603&psq=ET%e9%a2%84%e6%b5%8b%e6%a8%a1%e5%9e%8b%e6%98%af%e4%bb%80%e4%b9%88&u=a1aHR0cHM6Ly9ibG9nLmNzZG4ubmV0L3hibWF0cml4L2FydGljbGUvZGV0YWlscy82OTQ4ODg2Nw&ntb=1" \t "https://cn.bing.com/_blank); NB: Naive Bayes; AB: AdaBoost; LR: Logistic regression; KNN: K-nearest neighbor; SVM: Support vector machines
